# Supplementary material for: Determination of Natural Uranium and Thorium Levels in Environmental Matrices Surrounding Uranium Mining Sites via ICP-MS
Source: Research Square preprint supplement (doi:10.21203/rs.3.rs-7963071/v1), 2025-11-11
Supplement: Supplementary file 1 [file df1521724deae9bc990e5e51.docx]

**Supplementary Information**

Determination of Natural Uranium and Thorium Levels in Environmental Matrices Surrounding Uranium Mining Sites via ICP-MS

***Joel Augusto Moura Portoa, Lander de Jesus Alvesb, Hector Hugo Silva Medradoc, Josilene da Silva Rochac, Rodrigo Gibaut de Souza Góisc, Fábio Carvalho Nunesd, Marcelo Machado Vianaa, and Ana Paula de Carvalho Teixeiraa****

*aDepartment of Chemistry, Federal University of Minas Gerais (UFMG), Belo Horizonte, Minas Gerais, Brazil*

*bState University of Santa Cruz (UESC), Postgraduate Program in Biology and Biotechnology of Microorganisms, Ilhéus, Bahia, Brazil*

*cIndústrias Nucleares do Brasil (INB) - Uranium Concentration Unit, Security, Radioprotection and Environment Management, Caetité, Bahia, Brazil*

*dFederal Institute of Education, Science and Technology of Bahia, Santa Inês, Bahia, Brazil*

_____________________________________

* anapaula.cta1@gmail.com

**Table S1.** Operating parameters adopted for PerkinElmer NexION® 300X ICP-MS.

| **Instrumental parameters** | |
| --- | --- |
| **Equipment used** | PerkinElmer NexION® 300X ICP-MS |
| **232Th detection limit** | < 0.5 ng.L-1 (ppt) |
| **RF Power** | 1600W |
| **Plasma gas flow** | 18 L min-1 |
| **Auxiliary gas flow** | 1.2 L min-1 |
| **Gas flow in the nebulizer** | 1.01 L min-1 |
| **KED Mode** |  |
| **input voltage** | -3.00 V |
| **Output voltage** | -32.00 V |
| **CROa** | -15.00 V |
| **QROb** | -12.00 V |
| **Data acquisition parameters** | |
| **Number of sweeps per read** | 50 |
| **Number of readings** | 1 |
| **Number of replicates** | 3 |
| **Dwell Time** | 25 s |
| **Collision gas** | - |
| **RPqc** | 0.25 V |
| **Gas flow in the Collision Cell** | - |
| **Calibration range** | 5.0 - 40.0µg L-1 |

a CRO (Cell Rod Offset) – voltage applied to the quadrupole of the reaction/collision cell;

b QRO (Quadrupole Rod Offset) – voltage applied to the mass analyzer quadrupole;

c RPq relates the voltage applied to the quadrupole rods and needs to be optimized.

**Figure S1.** Location of collection points.


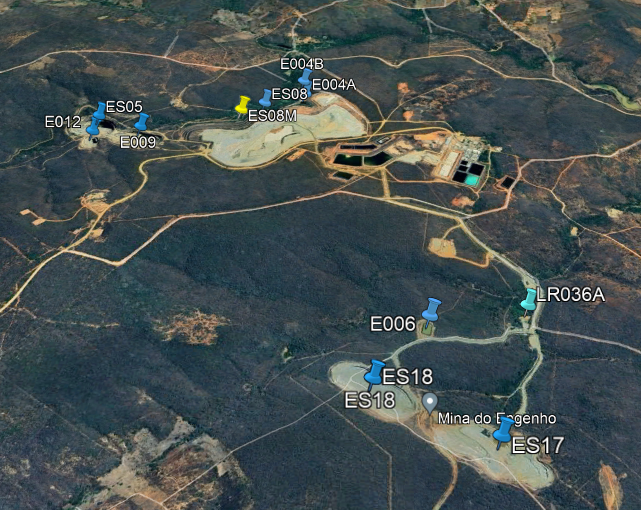


**Figure S2.** Location of collection points – Cachoeira Mine.

**
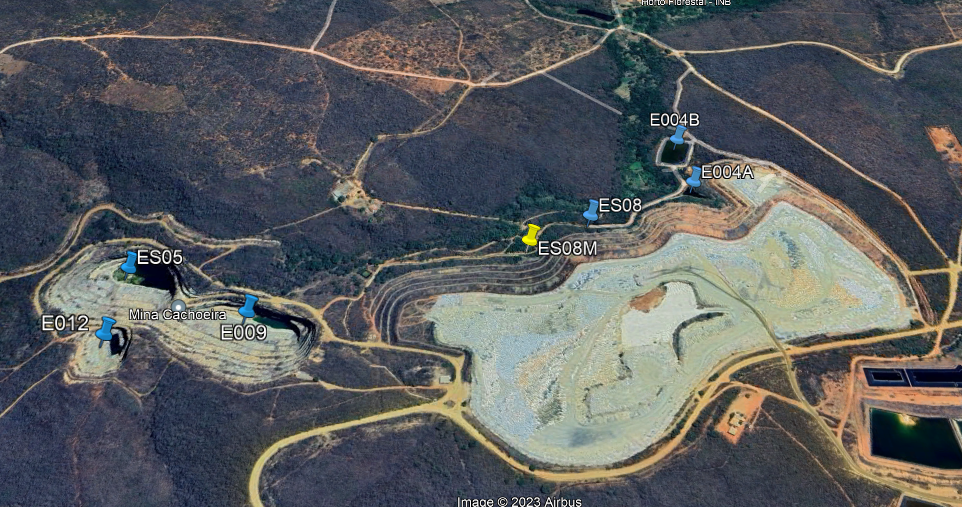
**

**Figure S3.** Location of collection points – Engenho Mine.


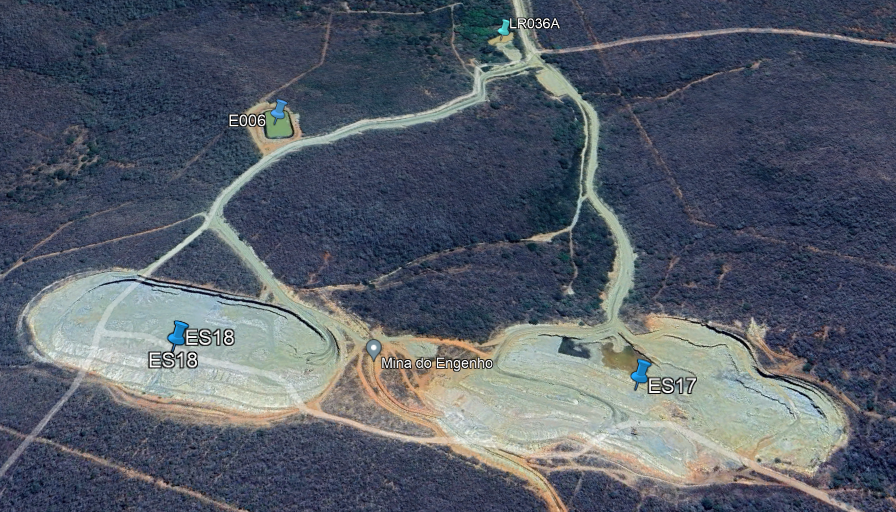


**Figure S4.** Calibration curve used in the determination of natural uranium.

**Figure S5.** Calibration curve used in the determination of natural thorium.
